# Supplementary material
Source: PubMed Central journal article supplement (PMC3932899)
Supplement: 1323436111_pnas.201323436SI.pdf [file 1323436111_pnas.201323436SI.pdf]

# Supporting Information

Zhang et al. 10.1073/pnas.1323436111

## SI Materials and Methods

**Immunization of NOD Mice.** To favor induction of R3-specific antibodies, groups of five female NOD mice were immunized four times at 3-wk intervals with two versions of the insulin peptide bound to IA<sup>g7</sup> in R3, both linked covalently to the N terminus of the IA<sup>g7</sup>  $\beta$ -chain via a flexible protein linker. The first immunization was with 100  $\mu$ g of IA<sup>g7</sup> bound to peptide R3:RAE emulsified in incomplete Freund's adjuvant (IFA), administered s.c. The second immunization was with 100  $\mu$ g of IA<sup>g7</sup> bound to R3:REss, also given s.c. in IFA. This variant has a cysteine substitution at position 62 of the IA<sup>g7</sup>  $\alpha$ -chain that allows the formation of a disulfide bond with the B19(p6) cysteine of the peptide. We also cleaved the peptide linker in this protein with thrombin to free the C terminus of the peptide and reduce the possibility of generating antibodies whose binding depended on this non-native linker of the complexes. The third immunization was a repeat of the first injection, and the final boost was with 100  $\mu$ g of a mixture of the two proteins without IFA given i.p. for the final boost.

**Hybridoma Generation and Screening.** To generate hybridomas, dispersed splenocytes and draining lymph node cells were harvested from single animals and mixed with the fusion partner Sp2/0-Ag14 (American Type Culture Collection) at a ratio of 5:1. After washing with HBSS to remove FBS, 1 mL of 40% (wt/vol)

PEG 8000 was added to the cell pellet drop wise over a period of 30 s. After an additional 30 s, 1 mL of FBS-free minimum essential medium for suspension culture (SMEM GIBCO 11380-037) was added with mixing over a total of 30 s. Finally 2 mL, 3 mL, 4 mL, 5 mL, and another 5 mL of FBS-free media was added drop wise with mixing to the cell pellet. The cells were then incubated at 37 °C for 10 min to induce complete fusion, washed with balanced salt solution, and then resuspended in SMEM containing 10% FBS at a density of  $4 \times 10^6$  cells per mL and 100- $\mu$ L aliquots were distributed in flat-bottom 96-well plates. The next day, 100  $\mu$ L of  $2 \times$  HAT selection medium (Hypoxanthine H,  $10^{-4}$  M; Aminopterin A,  $0.4 \times 10^{-6}$  M; Thymidine T,  $1.6 \times 10^{-5}$  M) was added. Supernatants from wells containing growing hybridomas were screened by ELISA with plates coated with IA<sup>g7</sup> bound to the R3:RE peptide or with control complexes, IA<sup>g7</sup>-HEL and IAb-3K. Antibodies that bound IA<sup>g7</sup>-insulin complex, but not the control complexes, were selected for cloning by limiting dilution. The clone with the strongest binding to the IA<sup>g7</sup>-insulin complex, mAb287, was chosen for all subsequent experiments. The mAb287 cells were subsequently adapted to grow in serum-free medium (GIBCO12045-076) supplemented with cholesterol (GIBCO 12531) and pluronic F-68. mAb287 antibody was affinity purified from the culture medium by using protein A Sepharose (GE 17-0618).

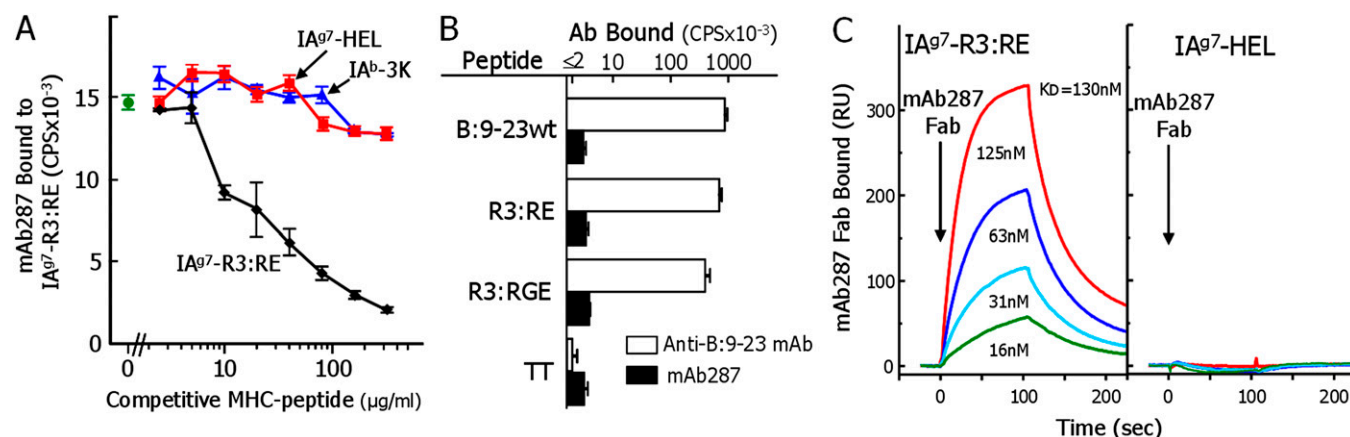

**Fig. S1.** Additional experiments to establish the specificity of mAb287. (A) Purified mAb287 (1 ng/mL) was preincubated with various concentrations of IA<sup>g7</sup>-R3:RE (black line), IA<sup>g7</sup>-HEL (red line), or IA<sup>b</sup>-3K (blue line). The competition mixtures were added to IA<sup>g7</sup>-R3:RE-coated ELISA plates and the bound mAb287 measured as described in *Materials and Methods*. Each bar is the average of the results of three independent experiments  $\pm$  SEM. (B) ELISA plates were coated with amino acid 9-23 peptide of the  $\beta$ -chain (B:9-23), R3:RE, R3:RGE, or TT soluble peptides, and binding of mAb287 or the B:9-23-specific mAb, AIP-46.12, (1  $\mu$ g/mL) was measured as described in *Materials and Methods*. The experiment was repeated twice with similar results. (C) As described in *Materials and Methods*, the binding kinetics of various concentrations of Fab fragments of mAb287 to immobilized IA<sup>g7</sup>-R3:RE (Left) or IA<sup>g7</sup>-HEL (Right) were recorded by using surface plasmon resonance. The overall affinity of the mAb was calculation with software supplied with the instrument. Similar results were obtained in a second experiment.





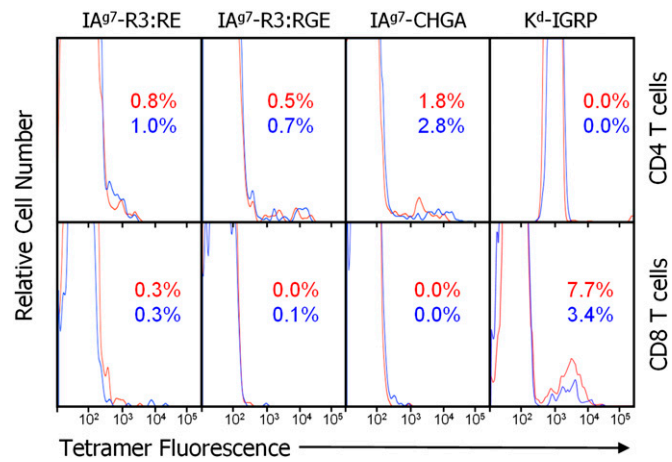

**Fig. S6.** Antigen-specific T cells detected in the pancreases of control and mAb287-treated mice. Pooled islet cells from the pancreases of the control (red) and mAb287 (blue) treated mice described in Fig. 3 *B–D* were gated on either live B220<sup>−</sup>CD4<sup>+</sup> or live B220<sup>−</sup>CD8<sup>+</sup> T cells and analyzed for the binding of IA<sup>97</sup>-insulin R3:RE, IA<sup>97</sup>-insulin R3:RGE, IA<sup>97</sup>-ChgA, and K<sup>d</sup>-IGRP tetramers. The percentages of specific tetramer<sup>+</sup> T cells for the IA<sup>97</sup> tetramers were calculated by subtracting the values obtained with CD8 T cells from those obtained with CD4 T cells and vice versa for the K<sup>d</sup> tetramer.
